# Supplementary material
Source: Springer Nature journal article supplement (https://www.springermedizin.de/resource/supplementary/12961_2009_152_MOESM2_ESM.pdf/9571556)

◆ = LUMC departments

Total Societal Quality

Scientific Quality

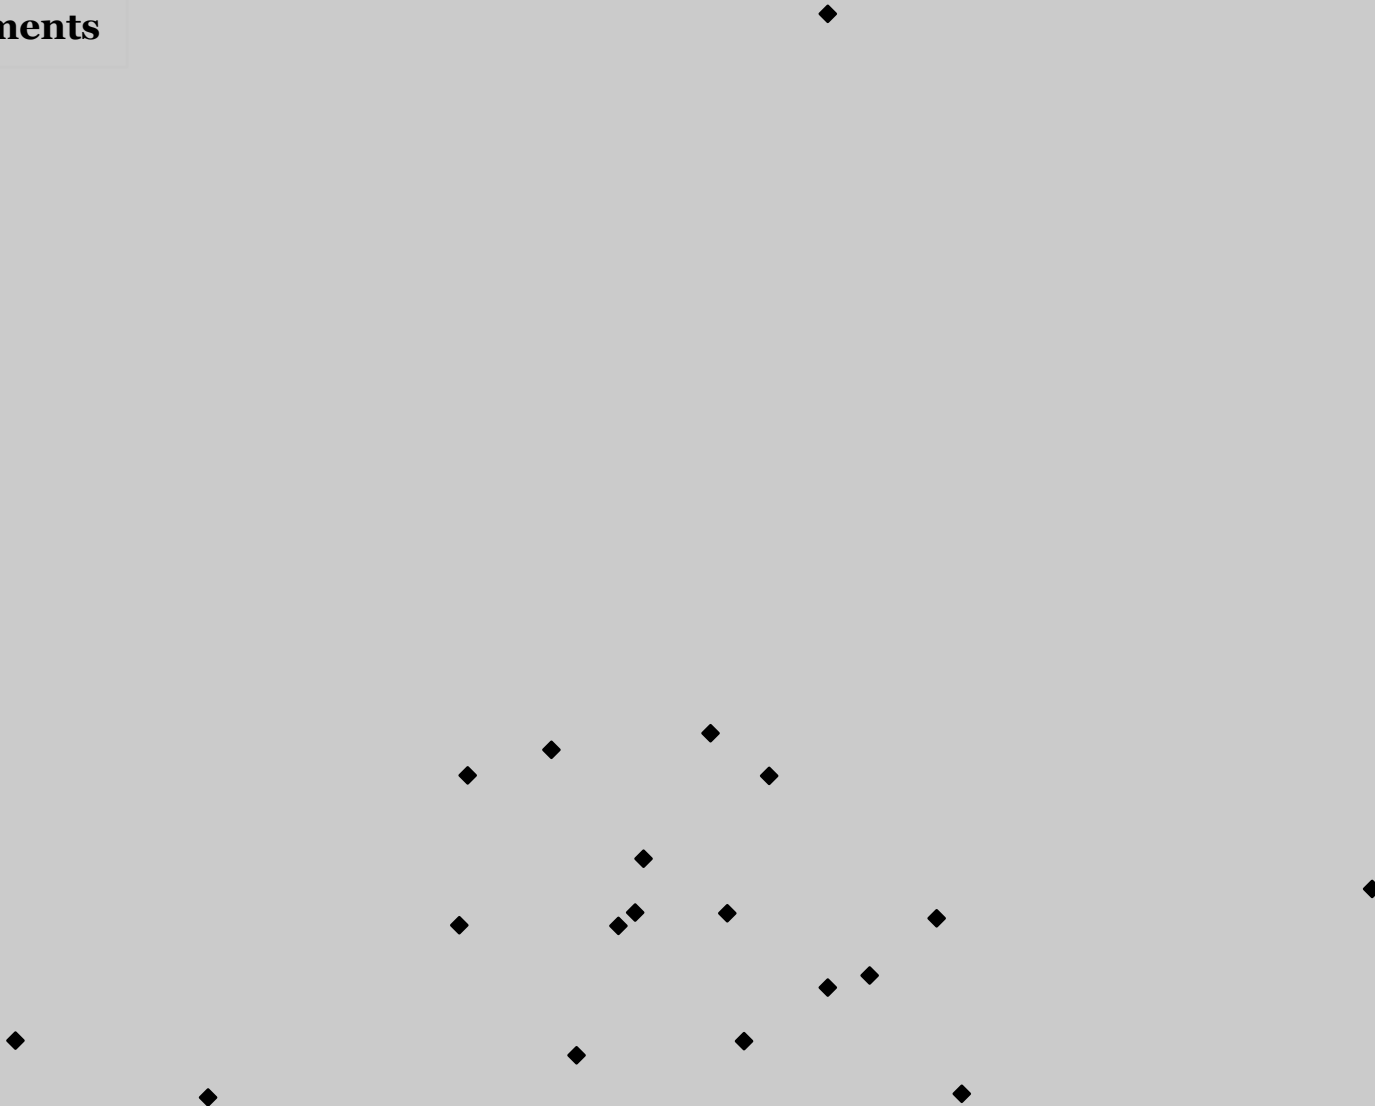

Supplement: MOESM2 [file 9571556]
